# Supplementary material for: Identification and characterization of the microRNA transcriptome of a moth orchid Phalaenopsis aphrodite
Source: PubMed Central journal article supplement (PMC3920020; doi:10.1007/s11103-013-0150-0), 2013-10-31
Supplement: 11103_2013_150_MOESM5_ESM.pdf [file 11103_2013_150_MOESM5_ESM.pdf]

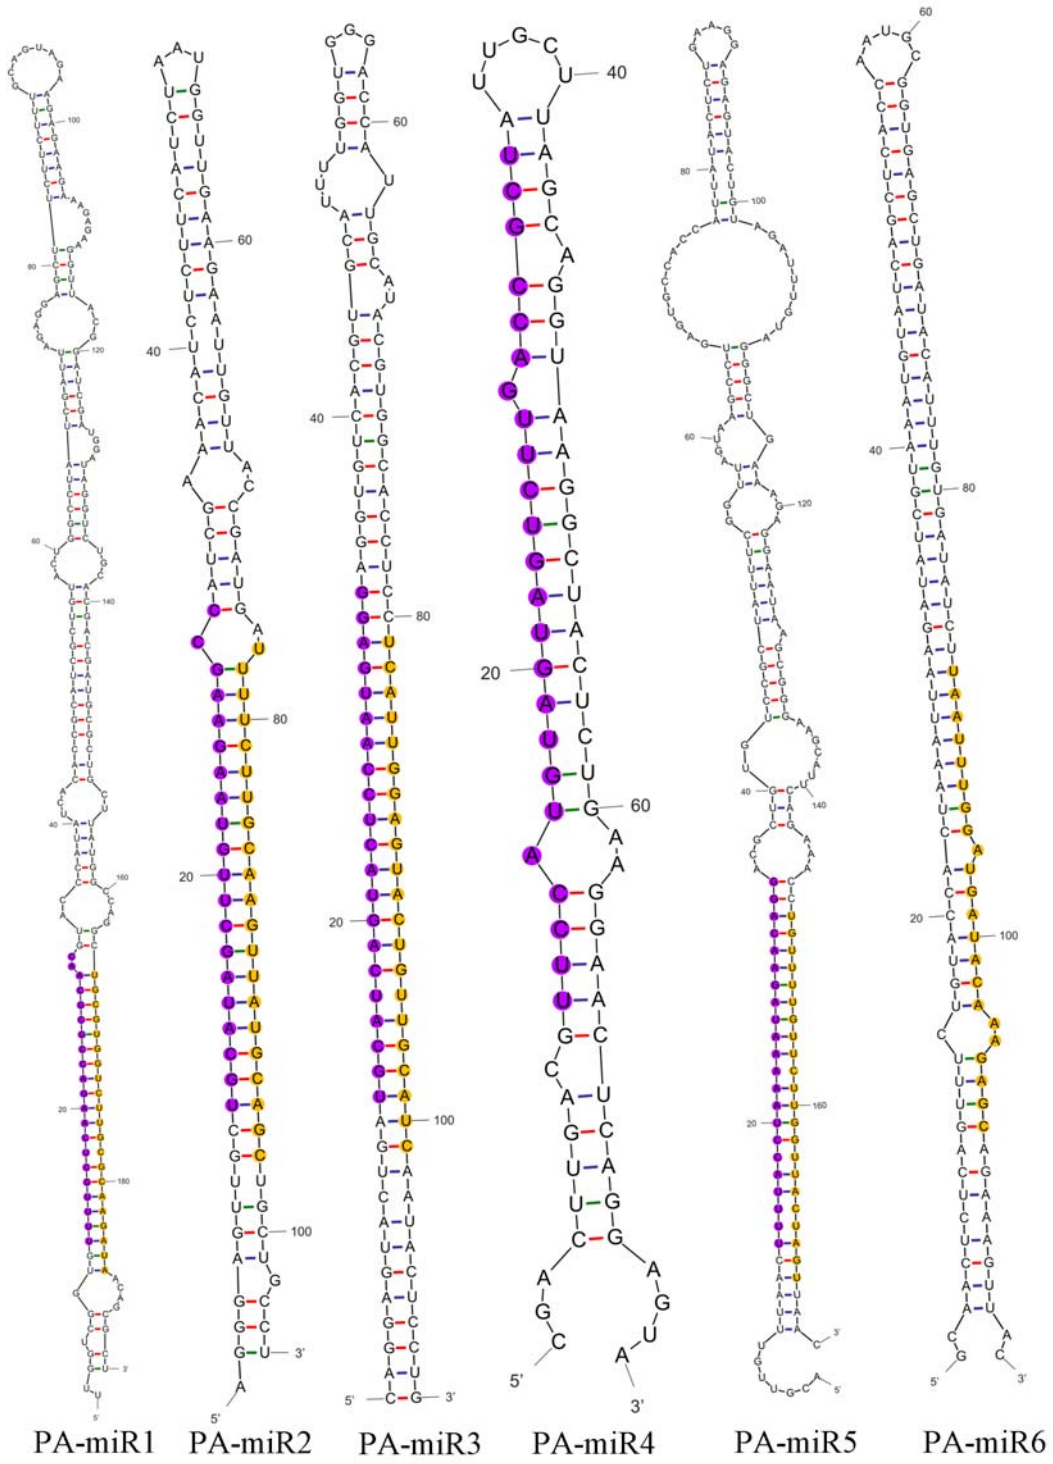

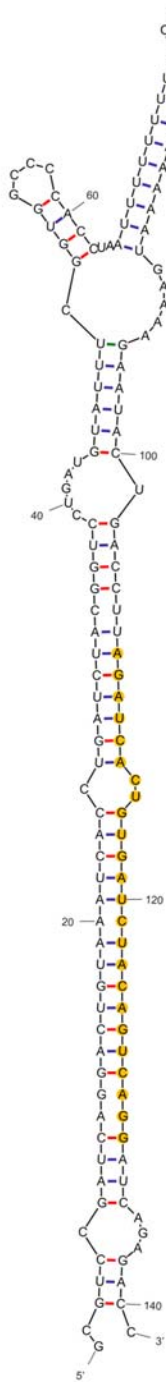

PA-miR7

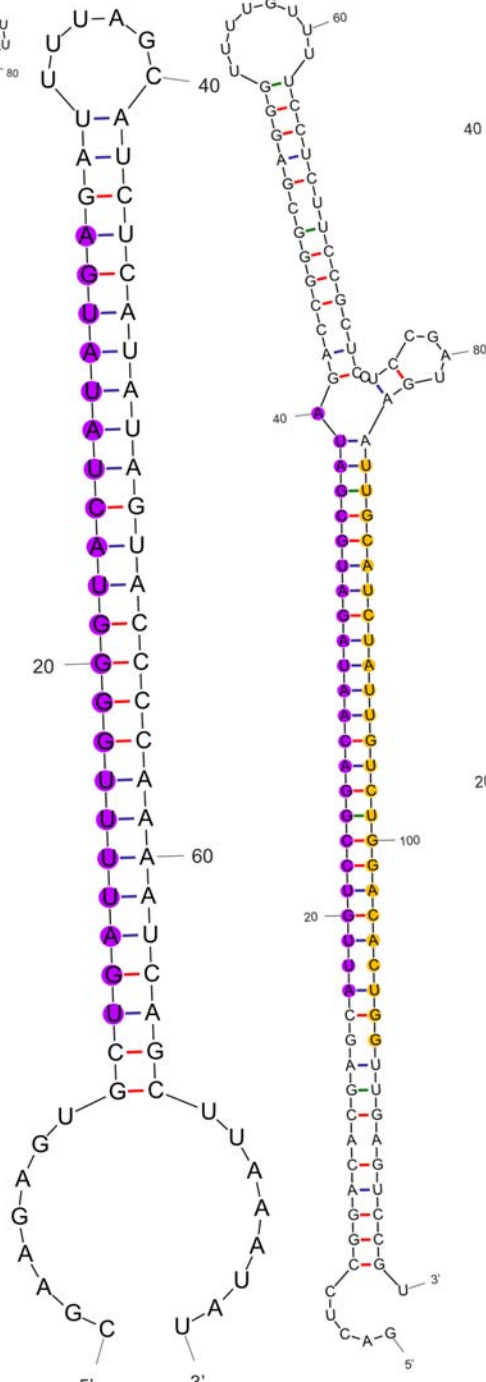

PA-miR8

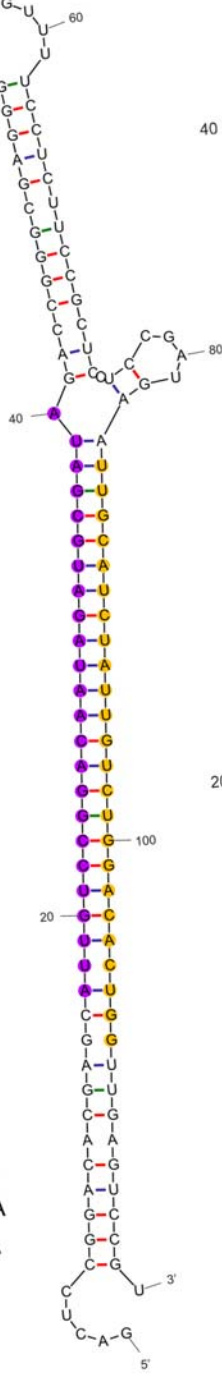

PA-miR9

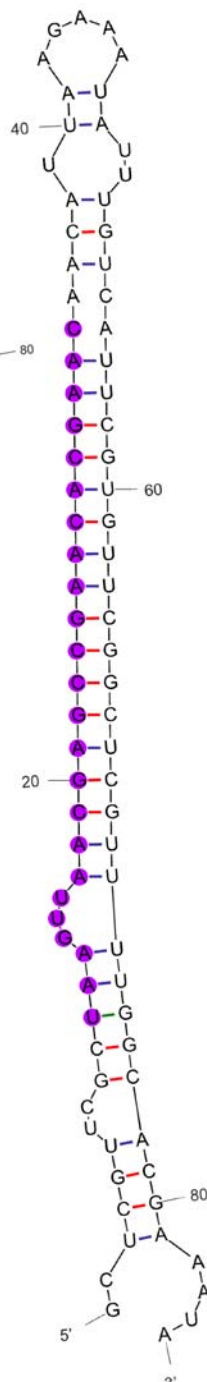

PA-miR10

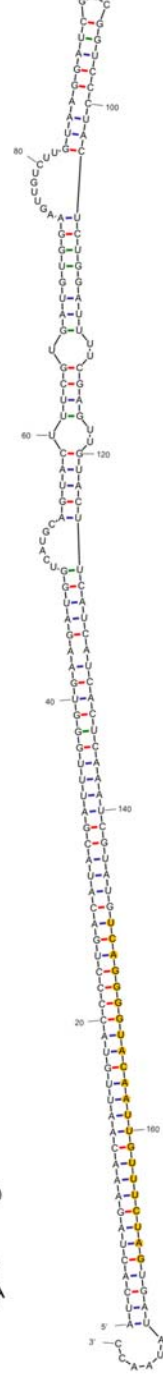

PA-miR11

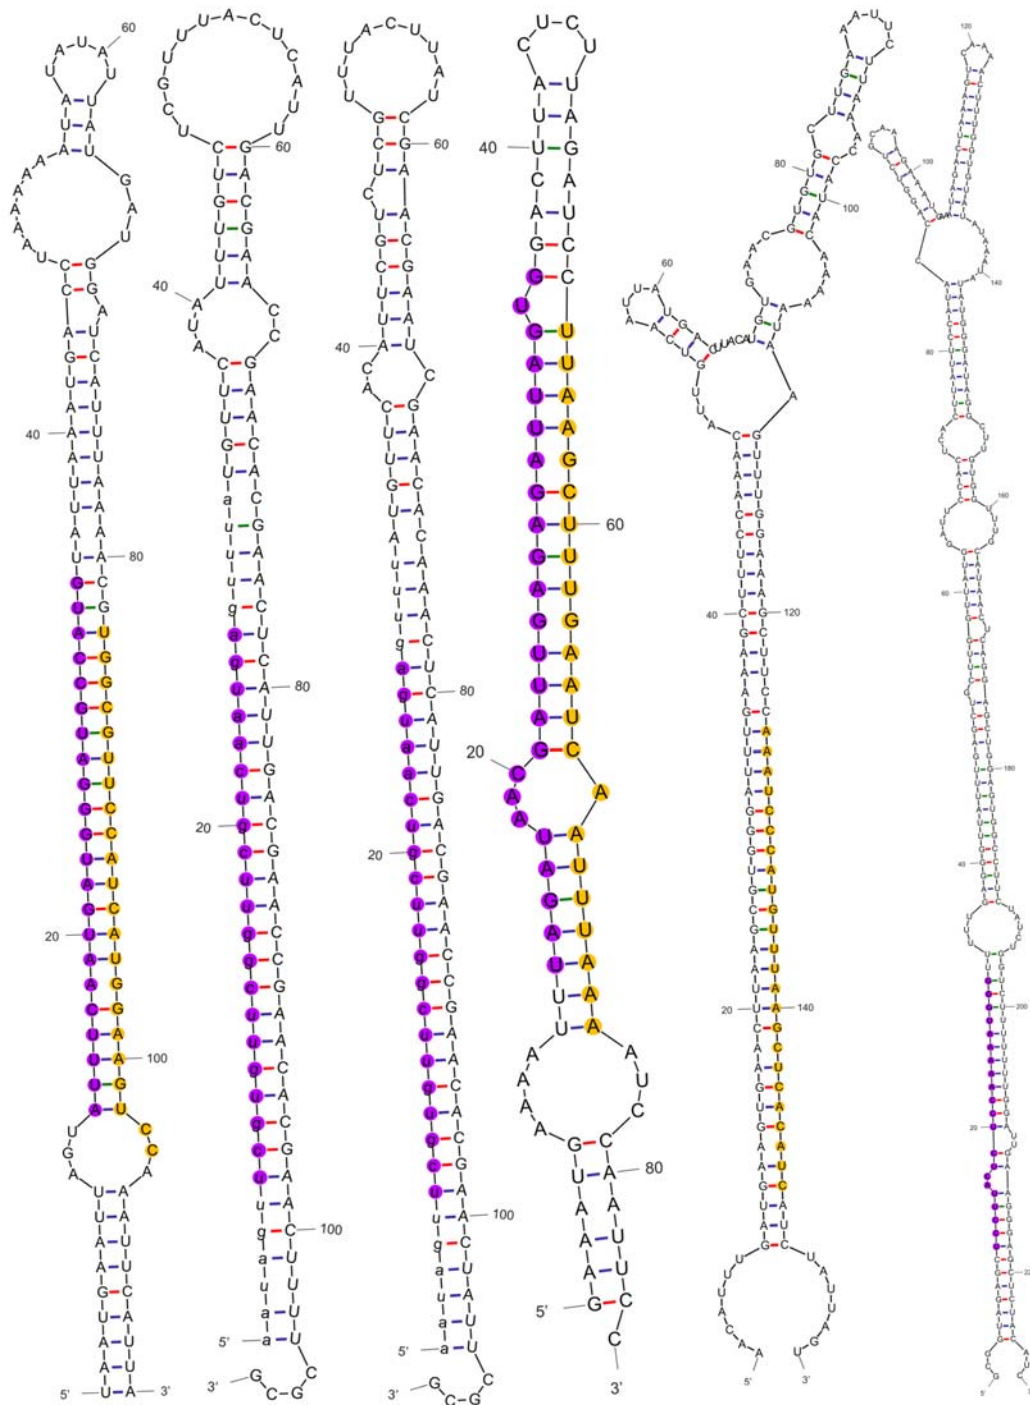

PA-miR12 PA-miR13a PA-miR13b PA-miR14 PA-miR15 PA-miR16

Supplemental Figure 5 Stem-loop structures of new miRNA precursors in *P. aphrodite*
