# Supplementary material for: Identification and characterization of the microRNA transcriptome of a moth orchid Phalaenopsis aphrodite
Source: PubMed Central journal article supplement (PMC3920020; doi:10.1007/s11103-013-0150-0), 2013-10-31

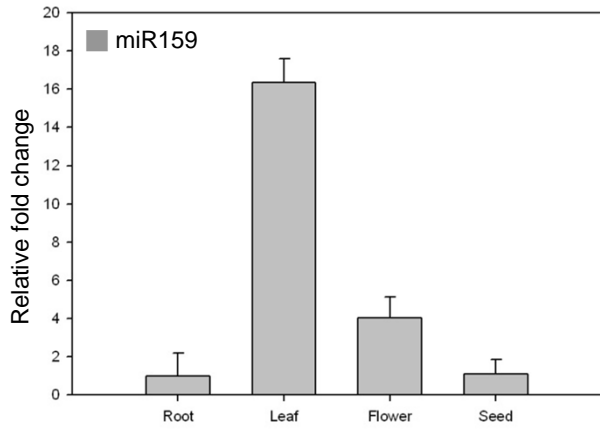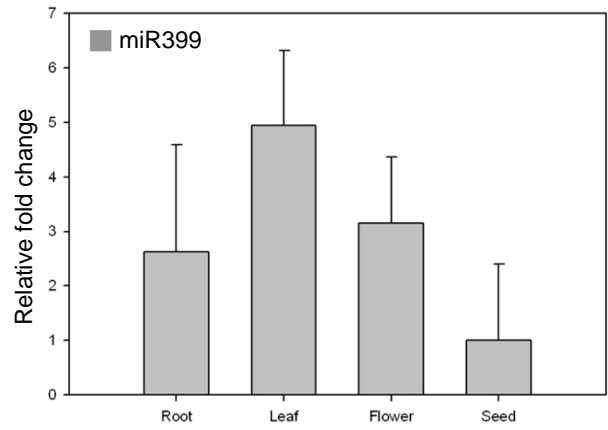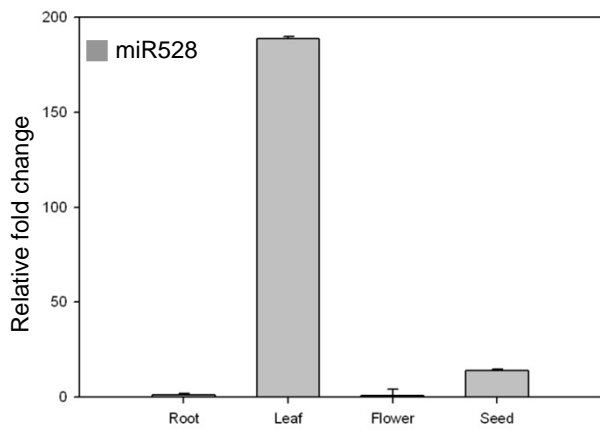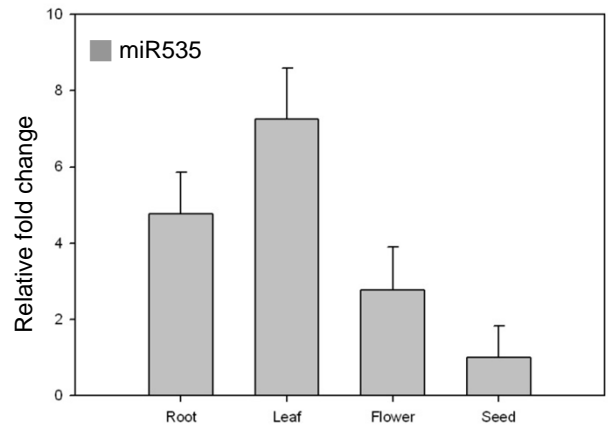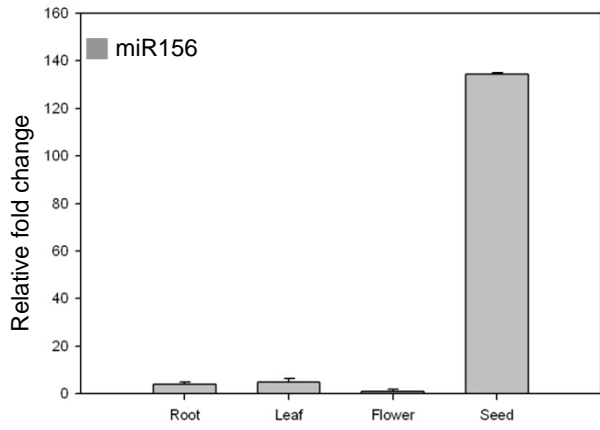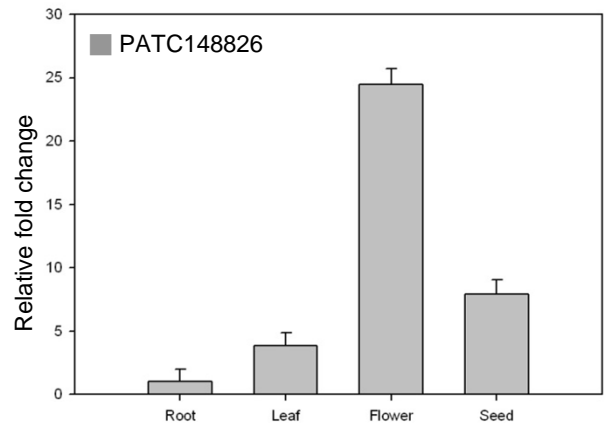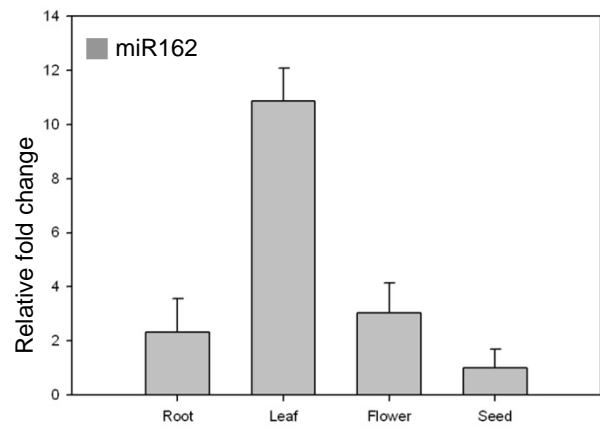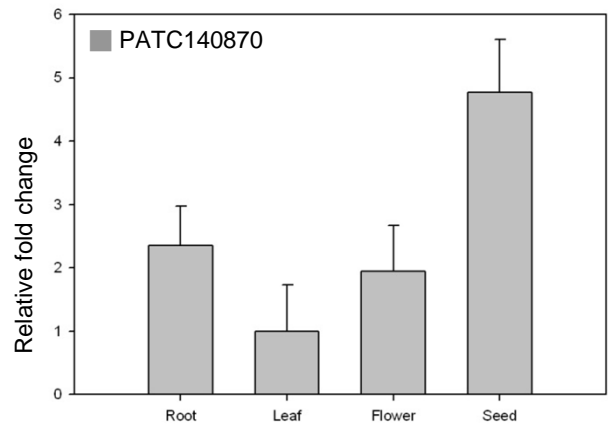

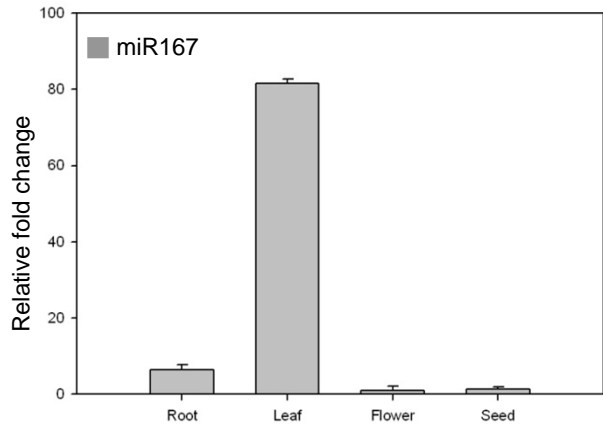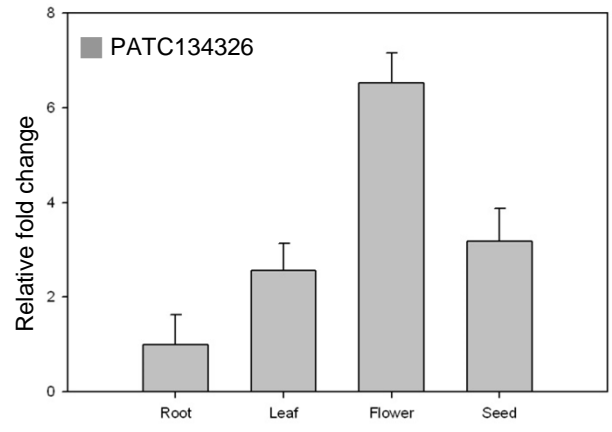

Supplement: 11103_2013_150_MOESM7_ESM.pdf [file 11103_2013_150_MOESM7_ESM.pdf]
