# Supplementary material for: Identification and characterization of the microRNA transcriptome of a moth orchid Phalaenopsis aphrodite
Source: PubMed Central journal article supplement (PMC3920020; doi:10.1007/s11103-013-0150-0), 2013-10-31

Supplemental Figure 8 Multiple alignment of TAS3 transcripts from *P. aphrodite* and 14 other plant species.

(a) The alignment of PaTAS3a in *P. aphrodite* (PATC148096) and its homologs of 14 other plant species, including *Panicum hallii* (JR068084), rice (OsTAS3a on chromosome 3) (Wang et al. 2010), *Arabidopsis* (AT3G17185), *Malus x domestica* (CN490861) (Xia et al. 2012), *Arachis hypogaea* (ES759435), *Manihot esculenta* (CK643507), *Citrus sinensis* (EY674848), *Quercus robur* (FP032778), *Lotus japonicus* (AK338955), *Glycine max* (CX710282), *Vigna unguiculata* (FG899643), *Vitis vinifera* (CF214752), *Theobroma cacao* (CU579872), *Gossypium hirsutum* (DW503626). Multiple alignment analyses were performed using MUSCLE (Edgar 2004) and edited using Jalview (Waterhouse et al. 2009). (b) Highly conserved sequences in the regions of miR390 target sites and tasiRNA-ARF sites.

## References

- Edgar RC (2004) MUSCLE: multiple sequence alignment with high accuracy and high throughput. *Nucleic acids research* 32 (5):1792-1797. doi:10.1093/nar/gkh340
- Wang J, Gao X, Li L, Shi X, Zhang J, Shi Z (2010) Overexpression of Osta-siR2141 caused abnormal polarity establishment and retarded growth in rice. *Journal of experimental botany* 61 (6):1885-1895. doi:10.1093/jxb/erp378
- Waterhouse AM, Procter JB, Martin DM, Clamp M, Barton GJ (2009) Jalview Version 2--a multiple sequence alignment editor and analysis workbench. *Bioinformatics* 25 (9):1189-1191. doi:10.1093/bioinformatics/btp033
- Xia R, Zhu H, An YQ, Beers EP, Liu Z (2012) Apple miRNAs and tasiRNAs with novel regulatory networks. *Genome biology* 13 (6):R47. doi:10.1186/gb-2012-13-6-r47

(A)

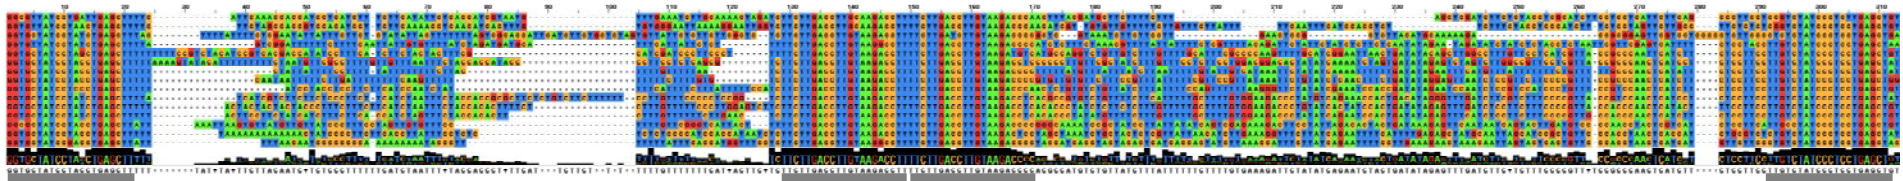

(B)

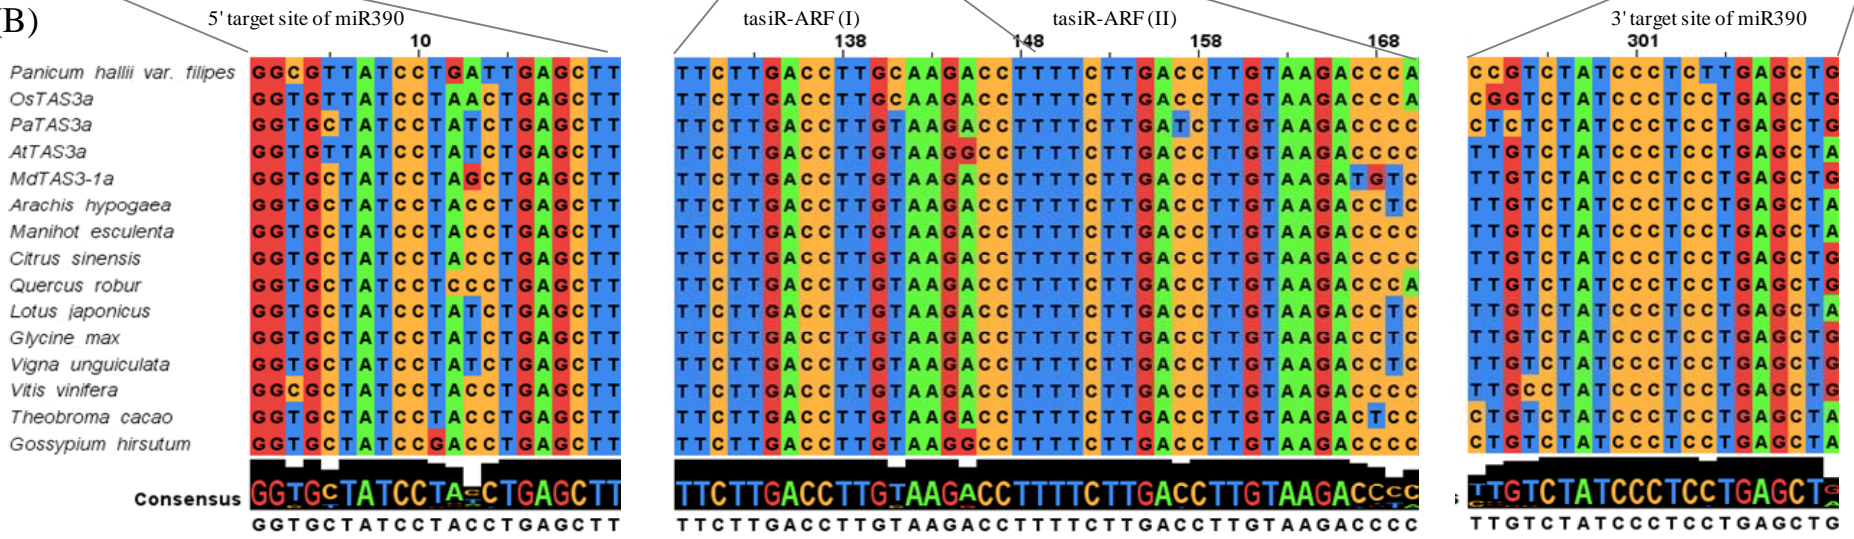

Supplement: 11103_2013_150_MOESM8_ESM.pdf [file 11103_2013_150_MOESM8_ESM.pdf]
