# Supplementary material for: Identification and characterization of the microRNA transcriptome of a moth orchid Phalaenopsis aphrodite
Source: PubMed Central journal article supplement (PMC3920020; doi:10.1007/s11103-013-0150-0), 2013-10-31
Supplement: 11103_2013_150_MOESM9_ESM.pdf [file 11103_2013_150_MOESM9_ESM.pdf]

Supplemental Table 1 List of primer sequences used in this study

| Family/Orchidstra ID               | Stem-loop RT primer                                           | Forward primer                                    |
|------------------------------------|---------------------------------------------------------------|---------------------------------------------------|
| miR156 / PASR13401425              | 5'-GTCGTATCCAGTGCAGGGTCCGA<br>GGTATTCGCACTGGATACGACGTGC<br>TC | 5'-CGGGGTGACAGAAGAGAGT                            |
| miR159 / PASR02106156              | 5'-GTCGTATCCAGTGCAGGGTCCGAG<br>GTATTCGCACTGGATACGACCAGAG<br>C | 5'-CGCGTTTGGATTGAAGGGA                            |
| miR162 / PASR17893510              | 5'-GTCGTATCCAGTGCAGGGTCCGAG<br>GTATTCGCACTGGATACGACCCGGAT     | 5'-CCGCTCGATAAACCTCTGC                            |
| miR167 / PASR07290166              | 5'-GTCGTATCCAGTGCAGGGTCCGAG<br>GTATTCGCACTGGATACGACTCAGAT     | 5'-GGATGAAGCTGCCAGCATG                            |
| miR399 / PASR13983513              | 5'-GTCGTATCCAGTGCAGGGTCCGAG<br>GTATTCGCACTGGATACGACCAGGG<br>C | 5'-GGCGTGCCAAAGGAGAATT                            |
| miR528 / PASR12940280              | 5'-GTCGTATCCAGTGCAGGGTCCGAG<br>GTATTCGCACTGGATACGACCTCCTC     | 5'-ACGTGGAAGTGGCATGCA                             |
| miR535 / PASR11244591              | 5'-GTCGTATCCAGTGCAGGGTCCGAG<br>GTATTCGCACTGGATACGACGCGTGC     | 5'-CACGCATGACAACGAGAGAG                           |
| miR5139 / PASR 17041531            | 5'-GTCGTATCCAGTGCAGGGTCCGAG<br>GTATTCGCACTGGATACGACTGGTAT     | 5'-GGCGCAACCTGGCTCTG                              |
| Orchidstra ID                      | Reverse primer                                                | Forward primer                                    |
| PATC148826<br>(Amplicon size: 131) | 5'-CGGCGATGTTTTCGGTATC<br>(T <sub>m</sub> = 60.03)            | 5'-CATCCGTCGGCTCTTCAT<br>(T <sub>m</sub> = 59.74) |
| PATC140870<br>(Amplicon size: 126) | 5'-CAATGAAGCCATCGTCCC<br>(T <sub>m</sub> = 60.06)             | 5'-CGGCTTCGTATTGGTTCG<br>(T <sub>m</sub> = 60.21) |
| PATC134326<br>(Amplicon size: 108) | 5'-GCGAAACTCCGATTCCT<br>(T <sub>m</sub> = 60.16)              | 5'-ATGGCGGAAACATTGGTG<br>(T <sub>m</sub> = 60.33) |
