# Supplementary material for: Identification and characterization of the microRNA transcriptome of a moth orchid Phalaenopsis aphrodite
Source: PubMed Central journal article supplement (PMC3920020; doi:10.1007/s11103-013-0150-0), 2013-10-31
Supplement: 11103_2013_150_MOESM10_ESM.pdf [file 11103_2013_150_MOESM10_ESM.pdf]

Supplemental Table 2 Adapter and primers used for 5' RACE experiments

| Name                  | Sequence                                           |
|-----------------------|----------------------------------------------------|
| RNA adapter           | 5'-CGACUGGAGCACGAGGACACUGACAUGGACUGAAGGAGUAGAAA-3' |
| RACE 5' primer        | 5'-CGACTGGAGCACGAGGACACTGA-3'                      |
| RACE 5' nested primer | 5'-GGACACTGACATGGACTGAAGGAGTA-3'                   |
| PATC146998-GSP        | 5'-TGGCCTTAGAACCTCAGGCACACTT-3'                    |
| PATC152414-GSP        | 5'-GGCAATTGTCACATCCTCCACACCAT-3'                   |
| PATC140870-GSP        | 5'-GAATCAACCCCGCTGCCTTCACAAT-3'                    |
| PATC140870-nested GSP | 5'-CGGATTACACCAAGCACGCGAAGAG-3'                    |
| PATC148783-GSP        | 5'-GCCCCGACGGTGCAGCTATAAATTCA-3'                   |
| PATC148783-nested GSP | 5'-TGTCCTGTTCCCTCACCCAGCATTGT-3'                   |
| PATC138350-GSP        | 5'-GGCATACATGTGAGACCCGTCATTTGC-3'                  |
| PATC138350-nested GSP | 5'-AGTTCGTGCATTAAGTTCCGGTGTGT-3'                   |
